# Supplementary material for: Microplastic Contamination in Urban, Farmland and Desert Environments along a Highway in Southern Xinjiang, China
Source: MDPI journal article supplement (doi:10.3390/ijerph19158890), 2022-07-22
Supplement: s1 [file s1]

# Microplastic Contamination in Urban, Farmland and Desert Environments along a Highway in Southern Xinjiang, China

Wenfeng Li <sup>1,2</sup>, Shuzhi Wang <sup>1,2</sup>, Rehemanjiang Wufuer<sup>1,2,\*</sup>, Jia Duo <sup>1,2</sup> and Xiangliang Pan <sup>2,3,\*</sup>

<sup>1</sup> National Engineering Technology Research Center for Desert-Oasis Ecological Construction, Xinjiang Institute of Ecology and Geography, Chinese Academy of Sciences, 818 South Beijing Road, Urumqi 830011, China; liwf86@ms.xjb.ac.cn (W.L.); wangshuzhi.1234@163.com (S.W.); duoja2017@ms.xjb.ac.cn (J.D.)

<sup>2</sup> Xinjiang Key Laboratory of Environmental Pollution and Bioremediation, Xinjiang Institute of Ecology and Geography, Chinese Academy of Sciences, Urumqi 830011, China

<sup>3</sup> Key Laboratory of Microbial Technology for Industrial Pollution Control of Zhejiang Province, College of Environment, Zhejiang University of Technology, Hangzhou 310014, China

\* Correspondence: reheman319@ms.xjb.ac.cn (R.W.); panxiangliang@163.com (X.P.); Tel.: +86-991-7823-147 (R.W.)

## Supplemental Materials

**Table S1.** The latitude and longitude of the sampling point

| Sampling sites | East longitude | Northern latitude |
|----------------|----------------|-------------------|
| S1             | 88.354112      | 42.471587         |
| S2             | 87.043924      | 42.164337         |
| S3             | 86.388255      | 42.085109         |
| S4             | 86.175503      | 41.723228         |
| S5             | 85.313010      | 41.525938         |
| S6             | 83.078241      | 41.415412         |
| S7             | 82.376130      | 41.096750         |
| S8             | 81.285256      | 40.545725         |
| S9             | 81.202698      | 40.357010         |
| S10            | 81.094723      | 40.314287         |
| S11            | 80.986576      | 40.021272         |
| S12            | 80.986555      | 39.533306         |
| S13            | 80.949862      | 39.129111         |
| S14            | 80.985117      | 38.761680         |
| S15            | 80.943832      | 38.405716         |
| S16            | 80.617118      | 38.097889         |
| S17            | 80.522275      | 37.807784         |
| S18            | 80.318685      | 37.537159         |
| S18            | 79.971714      | 37.274394         |
| S20            | 79.913993      | 37.111547         |
| S21            | 79.433052      | 37.110478         |
| S22            | 78.312968      | 37.350792         |

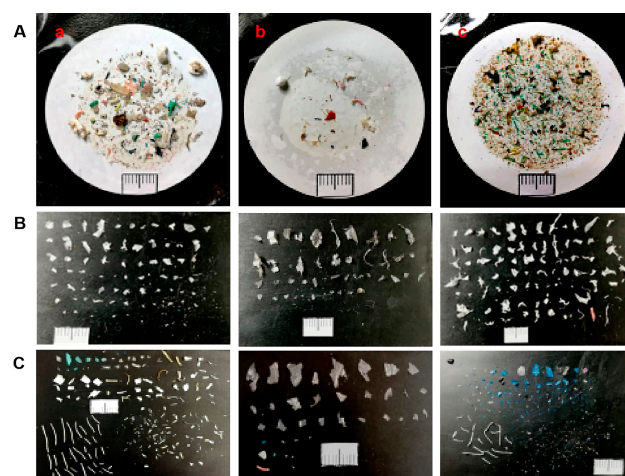

**Figure S1** Partial microplastic samples collected from the urban streets A (a: Korla; b: Alar; c: Hotan), farmland soils (B) and deserts (C) along a highway in southern Xinjiang, China (Scale:10 mm).

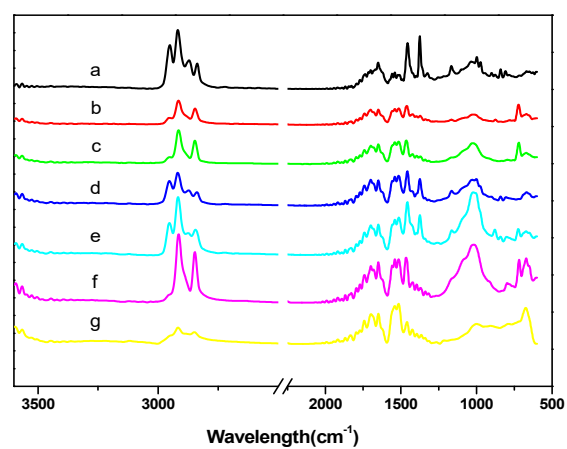

**Figure S2** Examples of ATR-FTIR spectras of different microplastic samples from the cities, farmlands and deserts along the highways in the southern Xinjiang, China; a, flake; b, film; c, d, fragment; e, f, fiber; g, rubber.

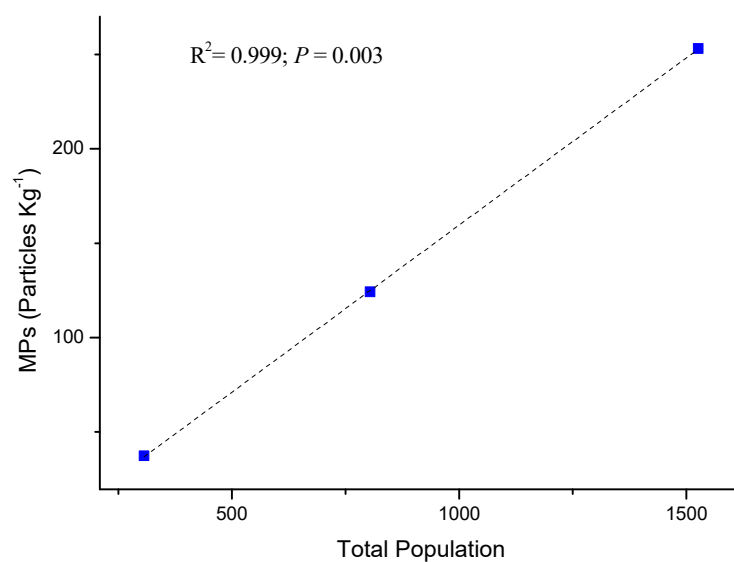

**Figure S3** Correlation analysis of MPs abundance and total population in urban streets.

According to the statistics yearbook of the Xinjiang Region (2019) and the Xinjiang Construction Corps (2019), the Bayingoll Mongol Autonomous Prefecture where Korla is located has a population of ~1.24 million, Aral has a population of ~372,000 and the population of Hotan district is ~2.53 million.
